# Supplementary material for: The chronic effects of change of direction during repeated-sprint training on jumping, sprinting, and change-of-direction abilities in players: a systematic review and meta-analysis
Source: PeerJ. 2025 May 20;13:e19416. doi: 10.7717/peerj.19416 (PMC12101437; doi:10.7717/peerj.19416)
Supplement: Supplemental Information 2 [file peerj-13-19416-s002.xlsx]

## Sheet: 5m (2)
study	Year	N1	Mean1	SD1	N2	Mean2	SD2	Outcome	Intervention
Pavillon(U17)	2021	9	1.14	0.06	9	1.31	0.03	T5	RS-OCOD
Pavillon(U19)	2021	9	1.2	0.09	9	1.11	0.21	T5	RS-OCOD
Pavillon(U15)	2021	9	1.21	0.07	9	1.15	0.02	T5	RS-OCOD
Zhao	2022	14	1.08	0.05	14	1.07	0.03	T5	RS-OCOD
Pavillon(U19)	2021	9	1.2	0.08	9	1.08	0.2	T5	RS-MCOD
Pavillon(U15)	2021	9	1.19	0.07	9	1.14	0.02	T5	RS-MCOD
Pavillon(U17)	2021	9	1.17	0.08	9	1.06	0.03	T5	RS-MCOD
Zhou	2024	10	0.97	0.05	10	0.82	0.03	T5	RS-MCOD

## Sheet: 10m (2)
study	Year	N1	Mean1	SD1	N2	Mean2	SD2	Outcome	Intervention
Zhao	2022	14	1.79	0.07	14	1.78	0.05	T10	RS-OCOD
Arede	2021	5	2.12	0.1	5	2.06	0.07	T10	RS-OCOD
Beato	2019a	10	1.8	0.08	10	1.79	0.09	T30	RS-OCOD
Beato	2019b	16	1.78	0.11	16	1.7	0.12	T10	RS-OCOD
Negra	2022	10	3.28	0.25	10	3.14	0.22	T10	RS-OCOD
Pavillon(U15)	2021	9	2.06	0.09	9	2.25	0.23	T10	RS-OCOD
Pavillon(U19)	2021	9	1.94	0.09	9	1.85	0.03	T10	RS-OCOD
Pavillon(U17)	2021	9	1.95	0.09	9	2.07	0.13	T10	RS-OCOD
Chtara	2017	12	1.9	0.07	12	1.82	0.06	T10	RS-OCOD
Pavillon(U15)	2021	9	1.94	0.11	9	1.84	0.03	T10	RS-MCOD
Pavillon(U17)	2021	9	1.93	0.1	9	1.79	0.12	T10	RS-MCOD
Pavillon(U19)	2021	9	2.03	0.1	9	2.14	0.06	T10	RS-MCOD
Sagelv	2019	9	3.05	0.15	9	3.05	0.13	T10	RS-MCOD
Stankovic	2024	15	3.54	0.18	15	3.35	0.22	T10	RS-MCOD

## Sheet: 20-40m (2)
study	Year	N1	Mean1	SD1	N2	Mean2	SD2	Outcome	Intervention
Beato(T20)	2019b	16	2.96	0.12	16	2.9	0.1	T20	RS-OCOD
Negra(T20)	2022	10	1.85	0.14	10	1.76	0.11	T20	RS-OCOD
Beato(T40)	2019a	10	5.47	0.22	10	5.45	0.21	T40	RS-OCOD
Zhao(T30)	2022	14	4.29	0.09	14	4.24	0.1	T30	RS-OCOD
Arede(T25)	2021	5	4.46	0.1	5	4.37	0.14	T25	RS-OCOD
Beato(T30)	2019a	10	4.27	0.15	10	4.26	0.16	T10	RS-OCOD
Chtara(T30)	2017	12	4.68	0.09	12	4.57	0.07	T30	RS-OCOD
Sagelv(T20)	2019	9	1.7	0.07	9	1.69	0.06	T20	RS-MCOD
Stankovic(T20)	2024	15	2.07	0.13	15	1.89	0.09	T20	RS-MCOD
Stankovic(T30)	2024	15	5.01	0.29	15	4.68	0.22	T30	RS-MCOD
Young(T20)	2013	8	3.25	0.18	8	3.11	0.15	T20	RS-MCOD

## Sheet: CMJ (2)
study	Year	N1	Mean1	SD1	N2	Mean2	SD2	Outcome	Intervention
Attene	2015	9	37.8	4.1	9	40.7	4.5	CMJ	RS-MCOD
Attene	2016	18	29.2	8.8	18	31	8.4	CMJ	RS-MCOD
Brini	2020	8	40.25	6.58	8	35.13	4.01	CMJ	RS-MCOD
Pavillon(U15)	2021	9	28.9	2.5	9	30.78	0.71	CMJ	RS-MCOD
Pavillon(U17)	2021	9	34.5	2.9	9	37.89	0.8	CMJ	RS-MCOD
Pavillon(U19)	2021	9	36.6	4.1	9	39.1	1.11	CMJ	RS-MCOD
Stankovic	2024	15	25.42	4	15	27.96	2.88	CMJ	RS-MCOD
Young	2013	8	26.4	4.4	8	28.2	4.6	CMJ	RS-MCOD
Arede	2021	5	22.55	0.9	5	24.53	1.19	CMJ	RS-OCOD
Attene	2015	9	35.3	2.8	9	36.5	3.4	CMJ	RS-OCOD
Attene	2016	18	29.6	8.5	18	31.3	7.8	CMJ	RS-OCOD
Pavillon	2021	9	26.7	3.3	9	30.68	0.67	CMJ	RS-OCOD
Pavillon	2021	9	29.7	4.2	9	34.72	0.79	CMJ	RS-OCOD
Pavillon	2021	9	32.9	3.9	9	38.3	1.11	CMJ	RS-OCOD
Zhao	2022	14	45	4.01	14	45.35	4.66	CMJ	RS-OCOD

## Sheet: SJ (2)
study	Year	N1	Mean1	SD1	N2	Mean2	SD2	Outcome	Intervention
Zhao	2022	14	42.68	3.92	14	43.58	4.03	SJ	RS-OCOD
Attene	2015	10	35	4	10	36.1	3.2	SJ	RS-OCOD
Attene	2016	18	28.1	7.8	18	29.5	7.5	SJ	RS-OCOD
Attene	2015	9	39.3	3.6	9	41.3	3.5	SJ	RS-MCOD
Attene	2016	18	27.9	8.5	18	29.9	8.3	SJ	RS-MCOD
Brini	2020	8	43.87	6.88	8	39	7.76	SJ	RS-MCOD
Stankovic	2024	15	22.62	3.22	15	25	2.62	SJ	RS-MCOD

## Sheet: COD (2)
study	Year	N1	Mean1	SD1	N2	Mean2	SD2	Intervention
Arede(505R)	2021	5	4.86	0.13	5	5	0.11	RS-OCOD
Arede(505L)	2021	5	4.91	0.21	5	4.93	0.18	RS-OCOD
Beato(505)	2019a	10	4.75	0.17	10	4.65	0.15	RS-OCOD
Beato(505)	2019b	16	4.7	0.21	16	4.73	0.16	RS-OCOD
Negra(505)	2022	10	2.48	0.2	10	2.33	0.15	RS-OCOD
Pavillon(SPS5-U15)	2021	9	1.3	0.22	9	1.14	0.01	RS-OCOD
Pavillon(SPS10-U19)	2021	9	2.07	0.12	9	2.07	0.04	RS-OCOD
Pavillon(SPS5-U17)	2021	9	1.22	0.09	9	1.24	0.14	RS-OCOD
Pavillon(SPS5-U19)	2021	9	1.23	0.06	9	1.05	0.03	RS-OCOD
Pavillon(SPS10-U15)	2021	9	2.28	0.08	9	2.15	0.02	RS-OCOD
Pavillon(SPS10-U17)	2021	9	2.13	0.11	9	2.28	0.14	RS-OCOD
Chtara(Zig-zag test)	2017	12	7.15	0.2	12	6.88	0.14	RS-OCOD
Brini(T-test)	2020	8	10.21	0.9	8	9.86	0.91	RS-MCOD
Javier(COD test)	2019	20	15.9	2.17	20	15.5	1.77	RS-MCOD
Pavillon(SPS5-U17))	2021	9	1.2	0.09	9	1.18	0.14	RS-MCOD
Pavillon(SPS5-U15)	2021	9	1.19	0.03	9	1.13	0.01	RS-MCOD
Pavillon(SPS10-U15)	2021	9	2.21	0.03	9	2.15	0.02	RS-MCOD
Pavillon(SPS5-U19)	2021	9	1.22	0.09	9	1.09	0.02	RS-MCOD
Pavillon(SPS10-U17)	2021	9	2.12	0.09	9	1.97	0.13	RS-MCOD
Pavillon(SPS10-U19))	2021	9	2.1	0.1	9	2.07	0.03	RS-MCOD
Stankovic(Pro-test)	2024	15	6.24	0.31	15	5.73	0.33	RS-MCOD
Stankovic(Zig-zag test)	2024	15	5.4	0.26	15	5.09	0.15	RS-MCOD
Stankovic(9-6-3-6-9)	2024	15	8.78	0.45	15	8.44	0.28	RS-MCOD
Zhou(Spider run test)	2024	10	16.51	0.79	10	16.28	0.63	RS-MCOD
Zhou(T-test)	2024	10	7.88	0.51	10	7.64	0.51	RS-MCOD
